# Supplementary material for: C-3-3 感光性ゾルゲル材料を用いた光スプリッターの作製と評価
Source: HighWire-hosted journal article supplement (doi:10.1136/bmjopen-2021-053832), 2003-09-10
Supplement: bmjopen-2021-053832supp003_data_supplement.pdf [file bmjopen-2021-053832supp003_data_supplement.pdf]

## APPENDIX C – Data extraction form content

| Section                                                                                                                                                                                                                                                        | Variables captured                                                                                                                                                                         | Answer options<br>(empty is open question)                                                                                                                                                                                                                    |
|----------------------------------------------------------------------------------------------------------------------------------------------------------------------------------------------------------------------------------------------------------------|--------------------------------------------------------------------------------------------------------------------------------------------------------------------------------------------|---------------------------------------------------------------------------------------------------------------------------------------------------------------------------------------------------------------------------------------------------------------|
| General section                                                                                                                                                                                                                                                | Email Address                                                                                                                                                                              |                                                                                                                                                                                                                                                               |
|                                                                                                                                                                                                                                                                | Title                                                                                                                                                                                      |                                                                                                                                                                                                                                                               |
|                                                                                                                                                                                                                                                                | First author (last name)                                                                                                                                                                   |                                                                                                                                                                                                                                                               |
|                                                                                                                                                                                                                                                                | Year published                                                                                                                                                                             |                                                                                                                                                                                                                                                               |
|                                                                                                                                                                                                                                                                | Disease area                                                                                                                                                                               | (General) respiratory tract infection<br>Influenza<br>Pneumonia (specifically)<br>Urinary tract infection<br>gastroenteritis<br>General reflux complaints<br>Tuberculosis<br>Malaria<br>Dengue<br>HIV<br>Fungal infection<br>Appendicitis<br>Typhoid<br>Other |
|                                                                                                                                                                                                                                                                | Specific pathogens (if given, separate by semicolon ;)                                                                                                                                     |                                                                                                                                                                                                                                                               |
|                                                                                                                                                                                                                                                                | Objective (from abstract)                                                                                                                                                                  |                                                                                                                                                                                                                                                               |
|                                                                                                                                                                                                                                                                | Research question(s)                                                                                                                                                                       |                                                                                                                                                                                                                                                               |
|                                                                                                                                                                                                                                                                | Health economic study?                                                                                                                                                                     | Yes<br>No                                                                                                                                                                                                                                                     |
|                                                                                                                                                                                                                                                                | Health economic study                                                                                                                                                                      | Explicit statement on the context of the study                                                                                                                                                                                                                |
| Explanation of relevance for health policy or practise decision                                                                                                                                                                                                |                                                                                                                                                                                            | Yes<br>No                                                                                                                                                                                                                                                     |
| Country                                                                                                                                                                                                                                                        |                                                                                                                                                                                            |                                                                                                                                                                                                                                                               |
| Is the model used based on a previously published model? (If yes, give author and year)                                                                                                                                                                        |                                                                                                                                                                                            |                                                                                                                                                                                                                                                               |
| Target population and subgroups                                                                                                                                                                                                                                |                                                                                                                                                                                            |                                                                                                                                                                                                                                                               |
| Setting (Primary care, hospital, home, etc.)                                                                                                                                                                                                                   |                                                                                                                                                                                            | Home<br>Primary care<br>Emergency department<br>Hospital<br>Other:                                                                                                                                                                                            |
| Study perspective                                                                                                                                                                                                                                              |                                                                                                                                                                                            | Societal perspective<br>Healthcare payer's perspective<br>Healthcare centre's perspective<br>Other:                                                                                                                                                           |
| Interventions or strategies being compared [separate different strategies with a semicolon ;]                                                                                                                                                                  |                                                                                                                                                                                            |                                                                                                                                                                                                                                                               |
| Duration of the intervention (years)                                                                                                                                                                                                                           |                                                                                                                                                                                            |                                                                                                                                                                                                                                                               |
| Treatment options included in the analysis [separate different strategies with a semicolon ;]                                                                                                                                                                  |                                                                                                                                                                                            |                                                                                                                                                                                                                                                               |
| Time horizon (years)                                                                                                                                                                                                                                           |                                                                                                                                                                                            |                                                                                                                                                                                                                                                               |
| Is a time framework and reasoning provided by the authors (are reasons given for the chosen time horizon, e.g. one flue season (when the time horizon is a couple of months to a year) or in concordance with the national guidelines, for a lifetime horizon) |                                                                                                                                                                                            | Yes<br>No                                                                                                                                                                                                                                                     |
| Discount rate for base case (health outcomes)                                                                                                                                                                                                                  |                                                                                                                                                                                            |                                                                                                                                                                                                                                                               |
| Discount rate for base case (economic outcomes)                                                                                                                                                                                                                |                                                                                                                                                                                            |                                                                                                                                                                                                                                                               |
| Study type [As qualified by the authors]                                                                                                                                                                                                                       |                                                                                                                                                                                            |                                                                                                                                                                                                                                                               |
| Study type [As qualified by the reviewer (use Drummond book for background)]                                                                                                                                                                                   |                                                                                                                                                                                            |                                                                                                                                                                                                                                                               |
| What input parameters were used? (separate by semicolon ;)                                                                                                                                                                                                     |                                                                                                                                                                                            |                                                                                                                                                                                                                                                               |
| What were the reported output variables? (separate by semicolon ;)                                                                                                                                                                                             | Life years<br>Life expectancy<br>QALYs<br>DALYs<br>Quality-adjusted life expectancy (QALE)<br>Antibiotic prescriptions saved<br>Hospitalizations saved<br>Days free from disease<br>Other: |                                                                                                                                                                                                                                                               |

|                                                                                                                                                                                                                                                                                                                                                                                         |                                                                                                                                                                                                                                                                                     |
|-----------------------------------------------------------------------------------------------------------------------------------------------------------------------------------------------------------------------------------------------------------------------------------------------------------------------------------------------------------------------------------------|-------------------------------------------------------------------------------------------------------------------------------------------------------------------------------------------------------------------------------------------------------------------------------------|
| Measurement of effectiveness                                                                                                                                                                                                                                                                                                                                                            | Single-study based estimates<br>Synthesis-based estimates<br>Other:                                                                                                                                                                                                                 |
| Did the authors describe the following: for Single study-based estimates: describe fully the design features of the single effectiveness study and why the single study was a sufficient source of clinical effectiveness data; for synthesis-based estimates: describe fully the methods used for the identification of included studies and synthesis of clinical effectiveness data. | Yes<br>No                                                                                                                                                                                                                                                                           |
| Did the authors describe the population and methods used to elicit preferences for outcomes?                                                                                                                                                                                                                                                                                            | Yes<br>No<br>N/A                                                                                                                                                                                                                                                                    |
| Are the resource and cost estimations explained in the article?                                                                                                                                                                                                                                                                                                                         | Yes<br>No                                                                                                                                                                                                                                                                           |
| Costs of training method (in reported currency) [separate different strategies with a semicolon ;]                                                                                                                                                                                                                                                                                      |                                                                                                                                                                                                                                                                                     |
| Costs of treatment options (in reported currency) [separate different strategies with a semicolon ;]                                                                                                                                                                                                                                                                                    |                                                                                                                                                                                                                                                                                     |
| Currency/currencies reported                                                                                                                                                                                                                                                                                                                                                            | US dollars<br>Euros<br>Pound Sterling<br>Japanese yen<br>Other:                                                                                                                                                                                                                     |
| Currency year used                                                                                                                                                                                                                                                                                                                                                                      |                                                                                                                                                                                                                                                                                     |
| Is the method for currency conversion described?                                                                                                                                                                                                                                                                                                                                        | Yes<br>No                                                                                                                                                                                                                                                                           |
| Type of model                                                                                                                                                                                                                                                                                                                                                                           | Decision tree<br>Markov (compartmental) model<br>Discrete-event simulation<br>Individual sampling model<br>Dynamic compartmental model<br>Individual-contact model / agent-based model<br>Network model<br>Other:                                                                   |
| Is the model stochastic or deterministic                                                                                                                                                                                                                                                                                                                                                | Stochastic (or probabilistic)<br>Deterministic<br>Other:                                                                                                                                                                                                                            |
| Description of model                                                                                                                                                                                                                                                                                                                                                                    |                                                                                                                                                                                                                                                                                     |
| Software used to program the model and statistical analyses                                                                                                                                                                                                                                                                                                                             | Microsoft Excel<br>TreeAge<br>Pratt Medical Decision maker<br>IBM SPSS<br>R<br>Python<br>C++<br>Not reported<br>Other:                                                                                                                                                              |
| Is the model design thoroughly described in the article?                                                                                                                                                                                                                                                                                                                                | Yes<br>No                                                                                                                                                                                                                                                                           |
| Are structural or other assumptions underpinning the decision-analytical model described?                                                                                                                                                                                                                                                                                               | Yes<br>No                                                                                                                                                                                                                                                                           |
| Is a description given for the analytical methods supporting the evaluation? (e.g. methods for dealing with missing data, skewed data, uncertainty)                                                                                                                                                                                                                                     | Yes<br>No                                                                                                                                                                                                                                                                           |
| Is antibiotic resistance included in the model?                                                                                                                                                                                                                                                                                                                                         | Yes<br>No                                                                                                                                                                                                                                                                           |
| If yes, how is antibiotic resistance included?                                                                                                                                                                                                                                                                                                                                          |                                                                                                                                                                                                                                                                                     |
| Unit of incremental costs and outcomes                                                                                                                                                                                                                                                                                                                                                  | Costs or savings /QALY<br>Costs or savings /DALY<br>Costs or savings /LYG<br>Costs or savings /antibiotic prescription saved<br>Costs or savings /patient<br>QALYs/DALYs<br>Correct diagnoses<br>Time to correct diagnosis<br>Hospital length-of-stay<br>Disease duration<br>Other: |
| How is the uncertainty reported?                                                                                                                                                                                                                                                                                                                                                        | Deterministic sensitivity analysis (DSA)<br>Table of DSA                                                                                                                                                                                                                            |

|                                  |                                                                                               |                                                                                                                                                                                                                                                                                                                                                                                                            |
|----------------------------------|-----------------------------------------------------------------------------------------------|------------------------------------------------------------------------------------------------------------------------------------------------------------------------------------------------------------------------------------------------------------------------------------------------------------------------------------------------------------------------------------------------------------|
|                                  |                                                                                               | Tornado diagram of DSA<br>Sensitivity analysis graph (with one parameter varied)<br>Two-way sensitivity analysis graph<br>Three-way (or more) sensitivity analysis graph<br>Probabilistic sensitivity analysis (PSA)<br>Cost-effectiveness plane of PSA<br>Cost-effectiveness acceptability curve(s)<br>Cost-efficiency/efficiency frontier<br>Other:                                                      |
|                                  | Have subgroup analyses been performed? (If yes, which subgroups and how?)                     |                                                                                                                                                                                                                                                                                                                                                                                                            |
|                                  | Main findings                                                                                 |                                                                                                                                                                                                                                                                                                                                                                                                            |
|                                  | Are limitations of the study described?                                                       | Yes<br>No                                                                                                                                                                                                                                                                                                                                                                                                  |
|                                  | Specific limitations/gaps in the assessment of Training                                       |                                                                                                                                                                                                                                                                                                                                                                                                            |
|                                  | Is generalisability discussed?                                                                | Yes<br>No                                                                                                                                                                                                                                                                                                                                                                                                  |
|                                  | To what extent do authors consider the results generalizable?                                 | Specific hospital/healthcare center<br>Nationwide<br>Continental<br>Worldwide<br>Other:                                                                                                                                                                                                                                                                                                                    |
|                                  | Have the results been linked to current knowledge?                                            | Yes<br>No                                                                                                                                                                                                                                                                                                                                                                                                  |
|                                  | What is the main conclusion or conclusions? The strategy/strategies being compared was...     | Cost-saving<br>Cost-effective<br>Not cost-effective<br>Unclear<br>Other:                                                                                                                                                                                                                                                                                                                                   |
|                                  | If reported, which willingness-to-pay threshold(s) was/were used?                             |                                                                                                                                                                                                                                                                                                                                                                                                            |
|                                  | Source of funding                                                                             | Industrial<br>Governmental grant<br>Academic grant<br>No funding<br>Not reported<br>Other:                                                                                                                                                                                                                                                                                                                 |
|                                  | Is a statement on the conflicts of interest present?                                          | Yes<br>No                                                                                                                                                                                                                                                                                                                                                                                                  |
| <b>Non-Health economic study</b> | What is the research design?                                                                  |                                                                                                                                                                                                                                                                                                                                                                                                            |
|                                  | Country                                                                                       |                                                                                                                                                                                                                                                                                                                                                                                                            |
|                                  | Target population and subgroups                                                               |                                                                                                                                                                                                                                                                                                                                                                                                            |
|                                  | Setting (Primary care, hospital, home, etc.)                                                  | Home<br>Primary care<br>Emergency department<br>Hospital<br>Other:                                                                                                                                                                                                                                                                                                                                         |
|                                  | Interventions or strategies being analyzed [separate different strategies with a semicolon ;] |                                                                                                                                                                                                                                                                                                                                                                                                            |
|                                  | Treatment options included in the analysis [separate different strategies with a semicolon ;] |                                                                                                                                                                                                                                                                                                                                                                                                            |
|                                  | Duration of the intervention (years)                                                          |                                                                                                                                                                                                                                                                                                                                                                                                            |
|                                  | Variables reported/used (please specify all)                                                  | Life years<br>Life expectancy<br>QALYs<br>DALYs<br>Quality-adjusted life expectancy (QALE)<br>Antibiotic prescriptions saved<br>Hospitalizations saved<br>Days free from disease<br>Prescription of right antibiotics<br>Money spent on antibiotics<br>Mortality increase/decrease<br>De-escalation/escalation of antibiotic use<br>Duration of hospital stay<br>Number of diagnostic tests done<br>Other: |
|                                  | Is antibiotic resistance included in the research?                                            | Yes<br>No                                                                                                                                                                                                                                                                                                                                                                                                  |
|                                  | If yes, how is antibiotic resistance included?                                                |                                                                                                                                                                                                                                                                                                                                                                                                            |

|                                                                           |                                                                                            |
|---------------------------------------------------------------------------|--------------------------------------------------------------------------------------------|
| Have subgroup analyses been performed? (If yes, which subgroups and how?) |                                                                                            |
| Main findings                                                             |                                                                                            |
| Are limitations of the study described?                                   | Yes<br>No                                                                                  |
| Source of funding                                                         | Industrial<br>Governmental grant<br>Academic grant<br>No funding<br>Not reported<br>Other: |
| Is a statement on the conflicts of interest present?                      | Yes<br>No                                                                                  |
